# Supplementary material for: Epigenetic clocks and their association with trajectories in perceived discrimination and depressive symptoms among US middle-aged and older adults
Source: publisher site journal article supplement (doi:10.18632/aging.204150), 2022-07-01
Supplement: Supplementary file [file aging-v14i13-204150-supplementary-material-SD3.pdf]

## SUPPLEMENTARY TABLES

**Supplementary Table 1. Study sample exposure, mediator and outcomes overall, by sex and by race, HRS 2010-2016<sup>a</sup>.**

|                                                                     | Overall        | Males         | Females        | NHW            | Non-NHW        | P <sup>b</sup> <sub>sex</sub> | P <sup>b</sup> <sub>race</sub> |
|---------------------------------------------------------------------|----------------|---------------|----------------|----------------|----------------|-------------------------------|--------------------------------|
|                                                                     | Mean/% ± SE    | Mean/% ± SE   | Mean/% ± SE    | Mean/% ± SE    | Mean/% ± SE    |                               |                                |
| Trajectory Exposures, 2010-2016 <sup>c</sup>                        |                |               |                |                |                |                               |                                |
| <i>Trajectory in Experience of Discrimination score</i>             |                |               |                |                |                |                               |                                |
| Stable low                                                          | 83.0 ± 0.9     | 80.1 ± 1.4    | 85.2 ± 1.1     | 84.1 ± 0.9     | 77.5 ± 1.9     | Ref                           | Ref                            |
| Stable high                                                         | 17.0 ± 0.9     | 19.9 ± 1.4    | 14.7 ± 1.1     | 15.9 ± 0.9     | 22.5 ± 1.9     | 0.008 <sup>d</sup>            | 0.002 <sup>d</sup>             |
| <i>Trajectory in Reasons for Experience of Discrimination score</i> |                |               |                |                |                |                               |                                |
| Stable low                                                          | 31.3 ± 1.3     | 31.3 ± 1.8    | 31.3 ± 1.5     | 32.7 ± 1.5     | 24.7 ± 2.1     | 0.78                          | 0.14                           |
| Stable medium                                                       | 55.5 ± 1.4     | 56.5 ± 2.0    | 54.8 ± 1.7     | 56.1 ± 1.6     | 52.9 ± 2.7     | Ref                           | Ref                            |
| Stable high                                                         | 13.1 ± 0.7     | 12.2 ± 1.2    | 13.9 ± 1.0     | 11.2 ± 0.8     | 22.4 ± 1.9     | 0.31                          | <0.001 <sup>d</sup>            |
| Trajectory in CES-D total score                                     |                |               |                |                |                |                               |                                |
| Stable low                                                          | 55.1 ± 1.3     | 60.7 ± 1.7    | 50.5 ± 1.7     | 58.5 ± 1.6     | 38.4 ± 2.5     | Ref                           | Ref                            |
| Stable medium                                                       | 30.7 ± 1.3     | 27.4 ± 1.4    | 33.3 ± 1.7     | 28.7 ± 1.4     | 40.2 ± 2.5     | <0.001 <sup>d</sup>           | <0.001 <sup>d</sup>            |
| Stable high                                                         | 14.3 ± 0.7     | 12.0 ± 0.9    | 16.2 ± 1.0     | 12.8 ± 0.8     | 21.4 ± 2.0     | <0.001 <sup>d</sup>           | <0.001 <sup>d</sup>            |
| Point Exposures, 2010–2012                                          |                |               |                |                |                |                               |                                |
| Experience of discrimination score                                  | 9.39 ± 0.12    | 9.82 ± 0.20   | 9.05 ± 0.13    | 9.29 ± 0.12    | 9.87 ± 0.23    | 0.002 <sup>d</sup>            | 0.029                          |
| Reason for Perceived discrimination score                           | 1.086 ± 0.033  | 1.090 ± 0.06  | 1.08 ± 0.04    | 0.99 ± 0.03    | 1.56 ± 0.09    | 0.92                          | <0.001 <sup>d</sup>            |
| CES-D total score                                                   | 1.23 ± 0.04    | 1.11 ± 0.06   | 1.333 ± 0.05   | 1.12 ± 0.05    | 1.75 ± 0.11    | 0.008 <sup>d</sup>            | <0.001 <sup>d</sup>            |
| Point Mediators, 2014–2016                                          |                |               |                |                |                |                               |                                |
| Experience of discrimination score                                  | 9.30 ± 0.10    | 9.60 ± 0.2    | 9.06 ± 0.11    | 9.22 ± 0.11    | 9.70 ± 0.29    | 0.008 <sup>d</sup>            | 0.15                           |
| Reason for Perceived discrimination score                           | 1.072 ± 0.031  | 1.026 ± 0.05  | 1.11 ± 0.04    | 0.99 ± 0.04    | 1.49 ± 0.08    | 0.23                          | <0.001 <sup>d</sup>            |
| CES-D total score                                                   | 1.23 ± 0.04    | 1.04 ± 0.057  | 1.40 ± 0.056   | 1.15 ± 0.05    | 1.65 ± 0.10    | <0.001 <sup>d</sup>           | <0.001 <sup>d</sup>            |
| Epigenetic Clock Outcomes, 2016                                     |                |               |                |                |                |                               |                                |
| HORVATH DNAmAge                                                     | 65.7 ± 0.3     | 66.0 ± 0.4    | 65.5 ± 0.3     | 66.1 ± 0.3     | 63.8 ± 0.4     | 0.26 <sup>d</sup>             | <0.001 <sup>d</sup>            |
| HANNUM DNAmAge                                                      | 54.4 ± 0.3     | 55.1 ± 0.4    | 53.8 ± 0.3     | 54.9 ± 0.3     | 52.2 ± 0.4     | 0.004 <sup>d</sup>            | <0.001 <sup>d</sup>            |
| LEVINE DNAmAge                                                      | 57.0 ± 0.3     | 57.5 ± 0.4    | 56.7 ± 0.4     | 57.3 ± 0.3     | 55.9 ± 0.5     | 0.12 <sup>d</sup>             | 0.027                          |
| HORVATH 2 DNAmAge                                                   | 69.6 ± 24.9    | 69.8 ± 0.4    | 69.4 ± 0.3     | 69.9 ± 0.3     | 68.1 ± 0.4     | 0.41 <sup>d</sup>             | 0.001                          |
| LIN DNAmAge                                                         | 58.5 ± 0.3     | 58.9 ± 0.5    | 58.2 ± 0.3     | 59.0 ± 0.4     | 56.2 ± 0.5     | 0.18 <sup>d</sup>             | <0.001 <sup>d</sup>            |
| WEIDNER DNAmAge                                                     | 67.0 ± 0.3     | 67.4 ± 0.5    | 66.7 ± 0.4     | 67.2 ± 0.4     | 66.2 ± 0.5     | 0.27                          | 0.095                          |
| VIDAL-BRALO DNAmAge                                                 | 63.8 ± 0.2     | 64.6 ± 0.2    | 63.2 ± 0.2     | 64.2 ± 0.2     | 62.1 ± 0.3     | <0.001 <sup>d</sup>           | <0.001 <sup>d</sup>            |
| YANG DNAmAge                                                        | 0.067 ± 0.0003 | 0.067 ± 0.001 | 0.068 ± 0.000  | 0.066 ± 0.000  | 0.074 ± 0.001  | 0.44                          | <0.001 <sup>d</sup>            |
| ZHANG DNAmAge                                                       | -1.105 ± 0.013 | -0.989 ± 0.02 | -1.197 ± 0.015 | -1.085 ± 0.015 | -1.202 ± 0.025 | <0.001 <sup>d</sup>           | <0.001 <sup>d</sup>            |
| BOCKLANDT DNAmAge                                                   | 0.388 ± 0.002  | 0.380 ± 0.003 | 0.395 ± 0.003  | 0.382 ± 0.002  | 0.419 ± 0.004  | <0.001 <sup>d</sup>           | <0.001 <sup>d</sup>            |
| GARAGNANI DNAmAge                                                   | 0.714 ± 0.002  | 0.708 ± 0.003 | 0.719 ± 0.002  | 0.716 ± 0.002  | 0.705 ± 0.003  | 0.001 <sup>d</sup>            | 0.020                          |
| DNAm GRIMAGE                                                        | 67.4 ± 0.2     | 68.8 ± 0.3    | 66.2 ± 0.3     | 67.5 ± 0.3     | 66.8 ± 0.43    | <0.001 <sup>d</sup>           | 0.18 <sup>d</sup>              |
| MPOA                                                                | 1.072 ± 0.002  | 1.072 ± 0.003 | 1.059 ± 0.003  | 1.061 ± 0.002  | 1.080 ± 0.006  | 0.001 <sup>d</sup>            | 0.004 <sup>d</sup>             |

Abbreviations: CES-D: Centers for Epidemiological Studies-Depression; DNAm: DNA methylation; DNAmAge DNA methylation age; GBTM Group-based trajectory models. <sup>a</sup>Values are means ± SE or % ± SE, overall and across sex or race/ethnicity groups for main baseline and follow-up exposures and outcomes (See Methods section and OSM for details), taking into account sampling weights and sampling design complexity in multiple imputed data. Italicized findings have  $p < 0.10$  but  $>0.05$ . <sup>b</sup>Based on linear or multinomial logit models with sex or race as the only predictors of continuous and categorical variables, respectively, taking into account sampling weights and sampling design complexity in multiple imputed data. <sup>c</sup>Trajectory exposures determined using GBTM (See Methods section for detail). <sup>d</sup> $P < 0.05$  after further adjustment of other demographic variables, including age in 2016, birth cohort, sex and race.

**Supplementary Table 2. Trajectories in experience of discrimination, reasons for perceived discrimination and depressive symptoms (2010-2016) and their association with 13 epigenetic clocks (2016): Multiple OLS linear regression models, stratified analysis: HRS 2010-2016<sup>a,b</sup>.**

| Y =<br>Epigenetic<br>clock | X = Experience of<br>discrimination score trajectory |          | X = Reasons for perceived discrimination trajectory |          |                |          | X = CES-D total score trajectory |                     |                |                    |
|----------------------------|------------------------------------------------------|----------|-----------------------------------------------------|----------|----------------|----------|----------------------------------|---------------------|----------------|--------------------|
|                            | High vs. Low                                         |          | Medium vs. Low                                      |          | High vs. Low   |          | Medium vs. Low                   |                     | High vs. Low   |                    |
|                            | $\beta \pm SE$                                       | <i>P</i> | $\beta \pm SE$                                      | <i>P</i> | $\beta \pm SE$ | <i>P</i> | $\beta \pm SE$                   | <i>P</i>            | $\beta \pm SE$ | <i>P</i>           |
| HANNUM DNAmAge             |                                                      |          |                                                     |          |                |          |                                  |                     |                |                    |
| Model 1                    |                                                      |          |                                                     |          |                |          |                                  |                     |                |                    |
| NHW                        | +0.090 ± 0.306                                       | 0.77     | —                                                   | —        | —              | —        | +0.007 ± 0.258                   | 0.98                | +0.674 ± 0.375 | 0.078              |
| Non-White                  | -0.553 ± 0.490                                       | 0.26     | —                                                   | —        | —              | —        | 0.758 ± 0.618                    | 0.23                | 1.166 ± 0.577  | 0.048              |
| Model 2                    |                                                      |          |                                                     |          |                |          |                                  |                     |                |                    |
| NHW                        | -0.0165 ± 0.295                                      | 0.96     | —                                                   | —        | —              | —        | -0.0601 ± 0.252                  | 0.81                | +0.473 ± 0.385 | 0.22               |
| Non-White                  | -0.700 ± 0.470                                       | 0.14     | —                                                   | —        | —              | —        | +0.722 ± 0.646                   | 0.27                | +1.073 ± 0.555 | 0.060              |
| Model 3                    |                                                      |          |                                                     |          |                |          |                                  |                     |                |                    |
| NHW                        | -0.225 ± 0.316                                       | 0.48     | —                                                   | —        | —              | —        | -0.164 ± 0.273                   | 0.55                | +0.224 ± 0.394 | 0.57               |
| Non-White                  | -0.795 ± 0.478                                       | 0.10     | —                                                   | —        | —              | —        | +0.517 ± 0.638                   | 0.42                | 0.631 ± 0.714  | 0.38               |
| HORVATH 2 DNAmAge          |                                                      |          |                                                     |          |                |          |                                  |                     |                |                    |
| Model 1                    |                                                      |          |                                                     |          |                |          |                                  |                     |                |                    |
| NHW                        | +0.492 ± 0.322                                       | 0.13     | —                                                   | —        | —              | —        | —                                | —                   | —              | —                  |
| Non-White                  | -0.002 ± 0.545                                       | 0.99     | —                                                   | —        | —              | —        | —                                | —                   | —              | —                  |
| Model 2                    |                                                      |          |                                                     |          |                |          |                                  |                     |                |                    |
| NHW                        | +0.359 ± 0.316                                       | 0.26     | —                                                   | —        | —              | —        | —                                | —                   | —              | —                  |
| Non-White                  | +0.066 ± 0.545                                       | 0.91     | —                                                   | —        | —              | —        | —                                | —                   | —              | —                  |
| Model 3                    |                                                      |          |                                                     |          |                |          |                                  |                     |                |                    |
| NHW                        | +0.170 ± 0.337                                       | 0.62     | —                                                   | —        | —              | —        | —                                | —                   | —              | —                  |
| Non-White                  | -0.190 ± 0.504                                       | 0.71     | —                                                   | —        | —              | —        | —                                | —                   | —              | —                  |
| LIN DNAmAge                |                                                      |          |                                                     |          |                |          |                                  |                     |                |                    |
| Model 1                    |                                                      |          |                                                     |          |                |          |                                  |                     |                |                    |
| Males                      | -0.958 ± 0.457                                       | 0.041    | -0.455 ± 0.619                                      | 0.47     | -1.207 ± 0.664 | 0.075    | +0.462 ± 0.490                   | 0.35                | -0.829 ± 0.670 | 0.22               |
| Females                    | +1.397 ± 0.736                                       | 0.063    | +0.441 ± 0.578                                      | 0.45     | 0.682 ± 0.790  | 0.39     | +1.849 ± 0.483                   | <0.001 <sup>c</sup> | +1.506 ± 0.559 | 0.009 <sup>c</sup> |
| Model 2                    |                                                      |          |                                                     |          |                |          |                                  |                     |                |                    |
| Males                      | -0.823 ± 0.446                                       | 0.070    | -0.452 ± 0.600                                      | 0.45     | -1.111 ± 0.696 | 0.12     | +0.656 ± 0.500                   | 0.20                | -0.555 ± 0.623 | 0.38               |
| Females                    | +1.395 ± 0.726                                       | 0.060    | +0.405 ± 0.574                                      | 0.48     | +0.640 ± 0.793 | 0.42     | +1.889 ± 0.470                   | <0.001              | 1.618 ± 0.590  | 0.008              |
| Model 3                    |                                                      |          |                                                     |          |                |          |                                  |                     |                |                    |
| Males                      | -0.867 ± 0.412                                       | 0.040    | -0.593 ± 0.576                                      | 0.31     | -1.574 ± 0.691 | 0.027    | +0.586 ± 0.490                   | 0.24                | -0.711 ± 0.722 | 0.33               |
| Females                    | +1.203 ± 0.749                                       | 0.11     | +0.392 ± 0.574                                      | 0.50     | +0.291 ± 0.757 | 0.70     | +1.837 ± 0.489                   | <0.001              | 1.314 ± 0.636  | 0.044              |
| WEIDNER DNAmAge            |                                                      |          |                                                     |          |                |          |                                  |                     |                |                    |
| Model 1                    |                                                      |          |                                                     |          |                |          |                                  |                     |                |                    |
| NHW                        | +0.153 ± 0.743                                       | 0.84     | -0.534 ± 0.588                                      | 0.37     | -0.913 ± 0.901 | 0.32     | —                                | —                   | —              | —                  |
| Non-White                  | -1.086 ± 1.011                                       | 0.29     | -1.841 ± 1.445                                      | 0.21     | -1.429 ± 1.596 | 0.38     | —                                | —                   | —              | —                  |
| Model 2                    |                                                      |          |                                                     |          |                |          |                                  |                     |                |                    |
| NHW                        | +0.198 ± 0.769                                       | 0.80     | -0.486 ± 0.599                                      | 0.42     | -0.911 ± 0.887 | 0.31     | —                                | —                   | —              | —                  |
| Non-White                  | -0.939 ± 1.012                                       | 0.36     | -2.000 ± 1.453                                      | 0.18     | -1.494 ± 1.593 | 0.35     | —                                | —                   | —              | —                  |
| Model 3                    |                                                      |          |                                                     |          |                |          |                                  |                     |                |                    |
| NHW                        | +0.297 ± 0.760                                       | 0.70     | -0.549 ± 0.600                                      | 0.36     | -1.066 ± 0.931 | 0.26     | —                                | —                   | —              | —                  |
| Non-White                  | -0.747 ± 1.057                                       | 0.48     | -1.953 ± 1.315                                      | 0.14     | -1.668 ± 1.536 | 0.28     | —                                | —                   | —              | —                  |
| VIDAL-BRALO DNAmAge        |                                                      |          |                                                     |          |                |          |                                  |                     |                |                    |

|               |                   |                    |   |   |                |                    |                |                    |   |
|---------------|-------------------|--------------------|---|---|----------------|--------------------|----------------|--------------------|---|
| Model 1       |                   |                    |   |   |                |                    |                |                    |   |
| Males         | -0.874 ± 0.498    | 0.085              | — | — | —              | —                  | —              | —                  | — |
| Females       | +1.059 ± 0.420    | 0.015 <sup>c</sup> | — | — | —              | —                  | —              | —                  | — |
| NHW           | +0.065 ± 0.391    | 0.87               | — | — | —              | —                  | —              | —                  | — |
| Non-White     | +0.150 ± 0.585    | 0.80               | — | — | —              | —                  | —              | —                  | — |
| Model 2       |                   |                    |   |   |                |                    |                |                    |   |
| Males         | -0.792 ± 0.492    | 0.11               | — | — | —              | —                  | —              | —                  | — |
| Females       | +0.914 ± 0.420    | 0.034              | — | — | —              | —                  | —              | —                  | — |
| NHW           | -0.007 ± 0.393    | 0.99               | — | — | —              | —                  | —              | —                  | — |
| Non-White     | +0.203 ± 0.553    | 0.71               | — | — | —              | —                  | —              | —                  | — |
| Model 3       |                   |                    |   |   |                |                    |                |                    |   |
| Males         | -0.803 ± 0.457    | 0.084              | — | — | —              | —                  | —              | —                  | — |
| Females       | +0.697 ± 0.443    | 0.12               | — | — | —              | —                  | —              | —                  | — |
| NHW           | -0.165 ± 0.375    | 0.66               | — | — | —              | —                  | —              | —                  | — |
| Non-White     | +0.118 ± 0.481    | 0.81               | — | — | —              | —                  | —              | —                  | — |
| YANG DNAmAge  |                   |                    |   |   |                |                    |                |                    |   |
| Model 1       |                   |                    |   |   |                |                    |                |                    |   |
| NHW           | -0.001 ± 0.001    | 0.26               | — | — | —              | —                  | —              | —                  | — |
| Non-White     | +0.003 ± 0.002    | 0.11               | — | — | —              | —                  | —              | —                  | — |
| Model 2       |                   |                    |   |   |                |                    |                |                    |   |
| NHW           | -0.0012 ± 0.0009  | 0.16               | — | — | —              | —                  | —              | —                  | — |
| Non-White     | +0.00228 ± 0.0019 | 0.24               | — | — | —              | —                  | —              | —                  | — |
| Model 3       |                   |                    |   |   |                |                    |                |                    |   |
| NHW           | -0.0015 ± 0.0009  | 0.085              | — | — | —              | —                  | —              | —                  | — |
| Non-White     | +0.0016 ± 0.0019  | 0.41               | — | — | —              | —                  | —              | —                  | — |
| ZHANG DNAmAge |                   |                    |   |   |                |                    |                |                    |   |
| Model 1       |                   |                    |   |   |                |                    |                |                    |   |
| NHW           | +0.041 ± 0.036    | 0.26               | — | — | —              | —                  | —              | —                  | — |
| Non-White     | -0.064 ± 0.058    | 0.27               | — | — | —              | —                  | —              | —                  | — |
| Model 2       |                   |                    |   |   |                |                    |                |                    |   |
| NHW           | +0.019 ± 0.035    | 0.59               | — | — | —              | —                  | —              | —                  | — |
| Non-White     | +0.002 ± 0.002    | 0.24               | — | — | —              | —                  | —              | —                  | — |
| Model 3       |                   |                    |   |   |                |                    |                |                    |   |
| NHW           | -0.0004 ± 0.0301  | 0.99               | — | — | —              | —                  | —              | —                  | — |
| Non-White     | -0.120 ± 0.058    | 0.043              | — | — | —              | —                  | —              | —                  | — |
| DNAm GRIMAGE  |                   |                    |   |   |                |                    |                |                    |   |
| Model 1       |                   |                    |   |   |                |                    |                |                    |   |
| NHW           | —                 | —                  | — | — | +0.586 ± 0.282 | 0.043              | 1.885 ± 0.408  | <0.001             |   |
| Non-White     | —                 | —                  | — | — | +1.464 ± 0.574 | 0.014 <sup>c</sup> | 1.934 ± 0.582  | 0.002 <sup>c</sup> |   |
| Model 2       |                   |                    |   |   |                |                    |                |                    |   |
| NHW           | —                 | —                  | — | — | +0.417 ± 0.248 | 0.098              | 1.241 ± 0.406  | 0.004              |   |
| Non-White     | —                 | —                  | — | — | +0.958 ± 0.590 | 0.11               | 1.392 ± 0.584  | 0.021              |   |
| Model 3       |                   |                    |   |   |                |                    |                |                    |   |
| NHW           | —                 | —                  | — | — | -0.027 ± 0.212 | 0.90               | +0.579 ± 0.354 | 0.11               |   |
| Non-White     | —                 | —                  | — | — | +0.253 ± 0.408 | 0.54               | +0.426 ± 0.501 | 0.40               |   |
| MPOA          |                   |                    |   |   |                |                    |                |                    |   |
| Model 1       |                   |                    |   |   |                |                    |                |                    |   |
| NHW           | —                 | —                  | — | — | +0.586 ± 0.282 | 0.043              | +1.885 ± 0.408 | <0.001             |   |

|                |   |   |   |                  |       |                  |       |
|----------------|---|---|---|------------------|-------|------------------|-------|
| Non-White      | — | — | — | +0.017 ± 0.0100  | 0.089 | +0.024 ± 0.012   | 0.055 |
| <b>Model 2</b> |   |   |   |                  |       |                  |       |
| NHW            | — | — | — | +0.0038 ± 0.0056 | 0.50  | 0.0119 ± 0.0083  | 0.16  |
| Non-White      | — | — | — | +0.0077 ± 0.0112 | 0.50  | +0.0109 ± 0.0127 | 0.40  |
| <b>Model 3</b> |   |   |   |                  |       |                  |       |
| NHW            | — | — | — | -0.0021 ± 0.0051 | 0.68  | +0.0032 ± 0.0081 | 0.70  |
| Non-White      | — | — | — | -0.0012 ± 0.0104 | 0.91  | -0.0023 ± 0.0118 | 0.85  |

Abbreviations: CES-D: Centers for Epidemiological Studies-Depression; DNAm: DNA methylation; DNAmAge: DNA methylation age; GBTM: Group-based trajectory models; HRS Health and Retirement Study; NHW: Non-Hispanic White. <sup>a</sup>OLS regression models with epigenetic clocks as alternative outcomes and trajectories in EOD, RPD and CES-D scores as alternative exposures. Subpopulation sample size  $N = 2,728$ , accounting for sampling weights, PSU and strata. Aside from fixed covariates and age which is measured in 2016, all other covariates were measured in 2010. Stratified analysis by sex and/or race was presented only when  $p < 0.05$  for Exposure\*sex or Exposure\*race for at least one contrast in the unstratified model with 2-way interaction terms. <sup>b</sup>Model 1 adjusted for sex, age in 2016, birth cohort and race/ethnicity; Model 2 further adjusted Model 1 for education and total wealth in 2010; Model 3 further adjusted Model 2 for the remaining socio-demographic, lifestyle and health-related factors (See Covariates section for detail). Italicized findings have  $p < 0.10$  but  $> 0.05$ . <sup>c</sup>Passed correction for multiple testing at type I error of 0.05 (corrected p-value accounting for exposure type: 0.017), applied only to Model 1.

**Supplementary Table 3. Experience of discrimination (EOD: 2010/2012) → depressive symptoms (CES-D: 2014/2016) → epigenetic clocks (2016): 4-way mediation analysis, overall and by sex and race, reduced model: HRS 2010–2016.**

| Y = Epigenetic clock     | Overall                      |              | Males                         |              | Females                |          | NHW                          |              | Non-Whites                    |              |
|--------------------------|------------------------------|--------------|-------------------------------|--------------|------------------------|----------|------------------------------|--------------|-------------------------------|--------------|
|                          | $\beta \pm SE$               | <i>P</i>     | $\beta \pm SE$                | <i>P</i>     | $\beta \pm SE$         | <i>P</i> | $\beta \pm SE$               | <i>P</i>     | $\beta \pm SE$                | <i>P</i>     |
| <b>HORVATH DNAmAge</b>   |                              |              |                               |              |                        |          |                              |              |                               |              |
| TE                       | -0.0007268 ± 0.0348995       | 0.98         | -0.0087547 ± 0.052328         | 0.87         | -0.0000364 ± 0.0477565 | 0.99     | -0.0009221 ± 0.0425617       | 0.98         | 0.0043068 ± 0.0600669         | 0.94         |
| CDE                      | 0.0004887 ± 0.0395531        | 0.99         | 0.0053674 ± 0.056734          | 0.93         | -0.0071211 ± 0.0553038 | 0.90     | 0.0011853 ± 0.0471137        | 0.98         | 0.0056666 ± 0.0729816         | 0.94         |
| INTREF                   | -0.00184 ± 0.0114849         | 0.87         | 0.002116 ± 0.0137432          | 0.88         | -0.0018813 ± 0.0173885 | 0.91     | -0.0024273 ± 0.0121818       | 0.84         | -0.0030151 ± 0.0278226        | 0.91         |
| INTMED                   | -0.0002063 ± 0.0012877       | 0.87         | 0.0002752 ± 0.0017872         | 0.88         | -0.0002035 ± 0.0018806 | 0.91     | -0.0003141 ± 0.0015762       | 0.84         | -0.0002463 ± 0.0022712        | 0.91         |
| PIE                      | 0.0008308 ± 0.0093485        | 0.93         | -0.0165133 ± 0.015121         | 0.28         | 0.0091695 ± 0.0126106  | 0.47     | 0.000634 ± 0.0111854         | 0.96         | 0.0019016 ± 0.0171206         | 0.91         |
| <b>HANNUM DNAmAge</b>    |                              |              |                               |              |                        |          |                              |              |                               |              |
| TE                       | -0.0089446 ± 0.0280294       | 0.75         | -0.0107057 ± 0.0424706        | 0.80         | -0.0070387 ± 0.0381099 | 0.85     | 0.0221764 ± 0.0344324        | 0.52         | -0.0704069 ± 0.0468303        | 0.13         |
| CDE                      | -0.0297586 ± 0.031751        | 0.35         | -0.0238521 ± 0.0460677        | 0.61         | -0.0339888 ± 0.0441126 | 0.44     | 0.0060065 ± 0.0381           | 0.88         | <i>-0.1056368 ± 0.0568774</i> | <i>0.063</i> |
| INTREF                   | 0.0072604 ± 0.0092252        | 0.43         | 0.0035162 ± 0.0111624         | 0.75         | 0.0107238 ± 0.0138821  | 0.44     | 0.0034773 ± 0.0098544        | 0.72         | 0.0204714 ± 0.0217358         | 0.35         |
| INTMED                   | 0.000814 ± 0.0010355         | 0.43         | 0.0004572 ± 0.0014519         | 0.75         | 0.0011598 ± 0.0015048  | 0.44     | 0.0004499 ± 0.0012753        | 0.72         | 0.001671 ± 0.001787           | 0.35         |
| PIE                      | <i>0.0127396 ± 0.0075701</i> | <i>0.092</i> | 0.009173 ± 0.0122279          | 0.45         | 0.0150665 ± 0.0101503  | 0.14     | 0.0122427 ± 0.0091175        | 0.18         | 0.0130875 ± 0.0134723         | 0.33         |
| <b>LEVINE DNAmAge</b>    |                              |              |                               |              |                        |          |                              |              |                               |              |
| TE                       | 0.0396396 ± 0.0371932        | 0.29         | 0.0455454 ± 0.0549787         | 0.41         | 0.0451332 ± 0.0513226  | 0.38     | <i>0.0864305 ± 0.0454536</i> | <i>0.057</i> | -0.0571024 ± 0.0637075        | 0.37         |
| CDE                      | 0.0224769 ± 0.0418809        | 0.59         | 0.0329356 ± 0.059269          | 0.58         | 0.0229713 ± 0.0590678  | 0.70     | 0.0731105 ± 0.0497503        | 0.14         | -0.0996989 ± 0.0773821        | 0.20         |
| INTREF                   | -0.0259646 ± 0.012219        | 0.034        | <i>-0.0271444 ± 0.0145359</i> | <i>0.062</i> | -0.0247268 ± 0.0186215 | 0.18     | -0.040623 ± 0.0130955        | 0.002        | 0.0239875 ± 0.0295548         | 0.42         |
| INTMED                   | -0.0029109 ± 0.0013822       | 0.035        | <i>-0.0035296 ± 0.0019092</i> | <i>0.064</i> | -0.0026742 ± 0.0020274 | 0.19     | -0.0052556 ± 0.0017347       | 0.002        | 0.001958 ± 0.0024253          | 0.42         |
| PIE                      | 0.0460382 ± 0.0105328        | <0.001       | 0.0432839 ± 0.0164261         | 0.008        | 0.0495628 ± 0.0143735  | 0.001    | 0.0591986 ± 0.0130336        | 0.000        | 0.0166511 ± 0.0183062         | 0.36         |
| <b>HORVATH 2 DNAmAge</b> |                              |              |                               |              |                        |          |                              |              |                               |              |
| TE                       | 0.0278322 ± 0.0238071        | 0.24         | 0.0344477 ± 0.0367005         | 0.35         | 0.0280118 ± 0.0319923  | 0.38     | 0.068629 ± 0.0291545         | 0.019        | -0.0594043 ± 0.0403658        | 0.14         |
| CDE                      | 0.0197312 ± 0.0269738        | 0.46         | 0.0280313 ± 0.0397602         | 0.48         | 0.0163424 ± 0.0370533  | 0.66     | 0.0646395 ± 0.0322449        | 0.045        | <i>-0.0867864 ± 0.0489916</i> | <i>0.076</i> |
| INTREF                   | 0.0005217 ± 0.0078321        | 0.95         | -0.007233 ± 0.0096498         | 0.45         | 0.0068647 ± 0.0116561  | 0.56     | -0.0065217 ± 0.0083473       | 0.44         | 0.0283076 ± 0.018786          | 0.13         |
| INTMED                   | 0.0000585 ± 0.0008781        | 0.95         | -0.0009405 ± 0.0012568        | 0.45         | 0.0007424 ± 0.0012623  | 0.56     | -0.0008437 ± 0.0010816       | 0.44         | 0.0023106 ± 0.0015616         | 0.13         |
| PIE                      | 0.0075208 ± 0.0064022        | 0.24         | 0.0145898 ± 0.0106449         | 0.171        | 0.0040624 ± 0.0084356  | 0.63     | 0.011355 ± 0.0077284         | 0.142        | -0.0032362 ± 0.0114978        | 0.78         |
| <b>LIN DNAmAge</b>       |                              |              |                               |              |                        |          |                              |              |                               |              |
| TE                       | 0.0109669 ± 0.0408529        | 0.79         | -0.0453771 ± 0.0602042        | 0.45         | 0.0611492 ± 0.0564145  | 0.28     | 0.0502662 ± 0.0504288        | 0.32         | -0.0612604 ± 0.0675806        | 0.37         |
| CDE                      | -0.0049886 ± 0.0462897       | 0.91         | -0.0397808 ± 0.0652912        | 0.54         | 0.0348879 ± 0.065273   | 0.59     | 0.04573 ± 0.0557751          | 0.41         | -0.1161494 ± 0.0820279        | 0.16         |
| INTREF                   | 0.0034203 ± 0.0134416        | 0.80         | 0.0064654 ± 0.0158241         | 0.68         | 0.0005928 ± 0.0205226  | 0.98     | -0.0126346 ± 0.0144425       | 0.38         | <i>0.0519658 ± 0.0314905</i>  | <i>0.099</i> |
| INTMED                   | 0.0003835 ± 0.0015071        | 0.80         | 0.0008407 ± 0.0020586         | 0.68         | 0.0000641 ± 0.0022195  | 0.98     | -0.0016346 ± 0.0018721       | 0.38         | 0.0042416 ± 0.0026266         | 0.11         |

|                     |                        |        |                        |       |                        |        |                        |        |                        |       |
|---------------------|------------------------|--------|------------------------|-------|------------------------|--------|------------------------|--------|------------------------|-------|
| PIE                 | 0.0121517 ± 0.0109815  | 0.268  | -0.0129023 ± 0.0173296 | 0.457 | 0.0256044 ± 0.0150755  | 0.089  | 0.0188054 ± 0.0133578  | 0.159  | -0.0013184 ± 0.019236  | 0.945 |
| WEIDNER DNAmAge     |                        |        |                        |       |                        |        |                        |        |                        |       |
| TE                  | -0.0744727 ± 0.0578073 | 0.20   | -0.0411406 ± 0.0859564 | 0.63  | -0.0719682 ± 0.0795334 | 0.37   | -0.0604088 ± 0.0711575 | 0.40   | -0.0814831 ± 0.0966803 | 0.40  |
| CDE                 | -0.1150437 ± 0.0655048 | 0.079  | -0.0603463 ± 0.0930547 | 0.52  | -0.1361453 ± 0.0920582 | 0.14   | -0.0804088 ± 0.078736  | 0.31   | -0.1832858 ± 0.1172614 | 0.12  |
| INTREF              | 0.023837 ± 0.0190515   | 0.21   | -0.0201874 ± 0.0226033 | 0.37  | 0.0591688 ± 0.0291271  | 0.042  | -0.0017923 ± 0.0203577 | 0.93   | 0.0927537 ± 0.0451729  | 0.040 |
| INTMED              | 0.0026724 ± 0.0021426  | 0.21   | -0.002625 ± 0.002946   | 0.37  | 0.0063991 ± 0.0031993  | 0.045  | -0.0002318 ± 0.0026339 | 0.93   | 0.0075711 ± 0.0038125  | 0.047 |
| PIE                 | 0.0140617 ± 0.0155209  | 0.37   | 0.0420182 ± 0.0250677  | 0.094 | -0.0013908 ± 0.0209327 | 0.95   | 0.0220242 ± 0.0188047  | 0.24   | 0.001478 ± 0.0275031   | 0.96  |
| VIDAL-BRALO DNAmAge |                        |        |                        |       |                        |        |                        |        |                        |       |
| TE                  | -0.0032406 ± 0.0271298 | 0.91   | -0.0110142 ± 0.0406386 | 0.79  | 0.0178137 ± 0.0371223  | 0.63   | 0.012165 ± 0.0334859   | 0.72   | -0.0303985 ± 0.0450071 | 0.50  |
| CDE                 | -0.0191508 ± 0.0307184 | 0.53   | -0.0139461 ± 0.0438741 | 0.75  | -0.013233 ± 0.0429826  | 0.76   | 0.0053836 ± 0.0369986  | 0.88   | -0.0765071 ± 0.0546499 | 0.16  |
| INTREF              | 0.0006006 ± 0.0089194  | 0.95   | -0.0208067 ± 0.0107698 | 0.053 | 0.0196147 ± 0.0135573  | 0.15   | -0.0106238 ± 0.0095887 | 0.27   | 0.0344447 ± 0.0209791  | 0.10  |
| INTMED              | 0.0000673 ± 0.001      | 0.95   | -0.0027055 ± 0.0014155 | 0.056 | 0.0021213 ± 0.0014779  | 0.15   | -0.0013745 ± 0.0012444 | 0.27   | 0.0028115 ± 0.0017496  | 0.11  |
| PIE                 | 0.0152423 ± 0.0073573  | 0.038  | 0.0264441 ± 0.011985   | 0.027 | 0.0093106 ± 0.0098205  | 0.34   | 0.0187797 ± 0.0089568  | 0.036  | 0.0088523 ± 0.0128794  | 0.49  |
| YANG DNAmAge        |                        |        |                        |       |                        |        |                        |        |                        |       |
| TE                  | -0.0000457 ± 0.0000981 | 0.64   | 0.0000648 ± 0.0001603  | 0.69  | -0.0001136 ± 0.0001255 | 0.37   | -0.000202 ± 0.0001191  | 0.090  | 0.0003161 ± 0.0001701  | 0.063 |
| CDE                 | -0.0001041 ± 0.0001112 | 0.35   | 0.0000274 ± 0.0001737  | 0.87  | -0.0002024 ± 0.0001454 | 0.16   | -0.000250 ± 0.000132   | 0.058  | 0.0002485 ± 0.0002066  | 0.23  |
| INTREF              | 0.000026 ± 0.0000323   | 0.42   | -0.0000233 ± 0.0000421 | 0.58  | 0.0000713 ± 0.0000459  | 0.12   | 0.0000149 ± 0.0000341  | 0.66   | 0.0000242 ± 0.0000788  | 0.76  |
| INTMED              | 0.0000029 ± 0.0000036  | 0.42   | -0.000003 ± 0.0000055  | 0.58  | 0.0000077 ± 0.000005   | 0.12   | 0.0000019 ± 0.0000044  | 0.66   | 0.000002 ± 0.0000064   | 0.76  |
| PIE                 | 0.0000295 ± 0.0000264  | 0.26   | 0.0000638 ± 0.0000465  | 0.17  | 0.0000098 ± 0.0000331  | 0.77   | 0.0000306 ± 0.0000314  | 0.33   | 0.0000414 ± 0.0000488  | 0.40  |
| ZHANG DNAmAge       |                        |        |                        |       |                        |        |                        |        |                        |       |
| TE                  | 0.0006654 ± 0.0022779  | 0.77   | 0.0022686 ± 0.0034092  | 0.51  | -0.0006544 ± 0.0031191 | 0.83   | 0.0011064 ± 0.0027764  | 0.69   | -0.0003756 ± 0.003924  | 0.92  |
| CDE                 | -0.0016618 ± 0.0025737 | 0.52   | 0.0001181 ± 0.0036842  | 0.97  | -0.0034306 ± 0.0036031 | 0.34   | -0.0014068 ± 0.003064  | 0.65   | -0.002299 ± 0.0047551  | 0.63  |
| INTREF              | 0.0000285 ± 0.0007473  | 0.97   | -0.0003537 ± 0.0008929 | 0.69  | 0.0004281 ± 0.0011331  | 0.71   | 0.000111 ± 0.0007923   | 0.89   | -0.0000962 ± 0.0018132 | 0.96  |
| INTMED              | 0.0000032 ± 0.0000838  | 0.97   | -0.000046 ± 0.0001162  | 0.69  | 0.0000463 ± 0.0001226  | 0.71   | 0.0000144 ± 0.0001025  | 0.89   | -0.0000079 ± 0.000148  | 0.96  |
| PIE                 | 0.0022954 ± 0.0006342  | <0.001 | 0.0025503 ± 0.0010164  | 0.012 | 0.0023018 ± 0.0008531  | 0.007  | 0.0023878 ± 0.0007607  | 0.002  | 0.0020274 ± 0.0011535  | 0.079 |
| BOCKLANDT DNAmAge   |                        |        |                        |       |                        |        |                        |        |                        |       |
| TE                  | 0.0005824 ± 0.0003788  | 0.12   | 0.0008922 ± 0.0005731  | 0.12  | 0.0002264 ± 0.0005152  | 0.66   | 0.0001703 ± 0.0004443  | 0.70   | +0.0015051 ± 0.0007172 | 0.036 |
| CDE                 | 0.000607 ± 0.0004292   | 0.16   | 0.0009645 ± 0.000621   | 0.12  | 0.0002283 ± 0.0005966  | 0.70   | 0.0001759 ± 0.0004914  | 0.72   | +0.0016907 ± 0.0008714 | 0.052 |
| INTREF              | 0.000073 ± 0.0001247   | 0.56   | 0.0001149 ± 0.0001507  | 0.45  | 0.000063 ± 0.0001876   | 0.74   | 0.0001355 ± 0.0001273  | 0.29   | -0.0002042 ± 0.0003326 | 0.54  |
| INTMED              | 0.0000082 ± 0.000014   | 0.56   | 0.0000149 ± 0.0000196  | 0.45  | 0.0000068 ± 0.0000203  | 0.74   | 0.0000175 ± 0.0000165  | 0.29   | -0.0000167 ± 0.0000272 | 0.54  |
| PIE                 | -0.0001058 ± 0.0001018 | 0.30   | -0.0002021 ± 0.0001658 | 0.22  | -0.0000717 ± 0.0001359 | 0.60   | -0.0001587 ± 0.0001176 | 0.18   | 0.0000353 ± 0.0002044  | 0.86  |
| GARAGNANI DNAmAge   |                        |        |                        |       |                        |        |                        |        |                        |       |
| TE                  | 0.0002897 ± 0.0002931  | 0.32   | 0.000342 ± 0.0004375   | 0.43  | 0.0003304 ± 0.000402   | 0.41   | 0.0001916 ± 0.0003633  | 0.60   | 0.0006222 ± 0.0004769  | 0.19  |
| CDE                 | 0.0001534 ± 0.0003321  | 0.64   | 0.0002808 ± 0.0004744  | 0.55  | 0.0001287 ± 0.0004656  | 0.78   | 0.0001363 ± 0.0004022  | 0.74   | 0.00034 ± 0.0005787    | 0.56  |
| INTREF              | 0.0000505 ± 0.0000964  | 0.60   | -0.0000515 ± 0.000115  | 0.65  | 0.0001287 ± 0.0001465  | 0.38   | 0.0000102 ± 0.000104   | 0.92   | 0.000084 ± 0.0002207   | 0.70  |
| INTMED              | 0.0000057 ± 0.0000108  | 0.60   | -0.0000067 ± 0.000015  | 0.65  | 0.0000139 ± 0.0000159  | 0.38   | 0.0000013 ± 0.0000135  | 0.92   | 0.0000069 ± 0.000018   | 0.70  |
| PIE                 | 0.00008 ± 0.0000787    | 0.31   | 0.0001194 ± 0.0001262  | 0.34  | 0.0000591 ± 0.000106   | 0.58   | 0.0000438 ± 0.0000956  | 0.65   | 0.0001913 ± 0.0001385  | 0.17  |
| DNAm GRIMAGE        |                        |        |                        |       |                        |        |                        |        |                        |       |
| TE                  | 0.01887 ± 0.0236422    | 0.42   | -0.0159779 ± 0.0362651 | 0.66  | 0.0512312 ± 0.0318333  | 0.11   | 0.0168434 ± 0.0283208  | 0.55   | 0.0243815 ± 0.0425455  | 0.57  |
| CDE                 | -0.0138229 ± 0.0266884 | 0.61   | -0.0515983 ± 0.0392338 | 0.19  | 0.0226063 ± 0.0366671  | 0.54   | -0.0179571 ± 0.0312126 | 0.57   | -0.0031184 ± 0.0515369 | 0.95  |
| INTREF              | 0.0042824 ± 0.0077517  | 0.58   | 0.0081435 ± 0.0095277  | 0.39  | -0.0028459 ± 0.0115296 | 0.81   | 0.0044353 ± 0.0080756  | 0.58   | 0.0031257 ± 0.0196526  | 0.87  |
| INTMED              | 0.0004801 ± 0.0008696  | 0.58   | 0.0010589 ± 0.0012415  | 0.39  | -0.0003078 ± 0.0012472 | 0.81   | 0.0005738 ± 0.0010456  | 0.58   | 0.0002551 ± 0.0016044  | 0.87  |
| PIE                 | 0.0279303 ± 0.0066752  | <0.001 | 0.026418 ± 0.0108004   | 0.014 | 0.0317785 ± 0.0089605  | <0.001 | 0.0297914 ± 0.0079126  | <0.001 | 0.0241191 ± 0.0125865  | 0.055 |
| MPOA                |                        |        |                        |       |                        |        |                        |        |                        |       |
| TE                  | 0.0005906 ± 0.0004832  | 0.22   | 0.0003824 ± 0.0007391  | 0.61  | 0.0007075 ± 0.0006528  | 0.28   | 0.0005948 ± 0.0005848  | 0.31   | 0.0006003 ± 0.0008484  | 0.48  |
| CDE                 | 0.0003396 ± 0.000546   | 0.53   | 0.0000211 ± 0.0008011  | 0.98  | 0.0005741 ± 0.0007523  | 0.45   | 0.0003818 ± 0.0006451  | 0.55   | 0.0002085 ± 0.0010286  | 0.84  |
| INTREF              | -0.0001603 ± 0.0001587 | 0.31   | 0.0000525 ± 0.0001941  | 0.79  | -0.0003636 ± 0.0002374 | 0.13   | -0.0002154 ± 0.0001673 | 0.20   | -0.000001 ± 0.0003922  | 1.00  |
| INTMED              | -0.000018 ± 0.0000178  | 0.31   | 0.0000068 ± 0.0000252  | 0.79  | -0.0000393 ± 0.0000259 | 0.13   | -0.0000279 ± 0.0000217 | 0.20   | -0.0000001 ± 0.000032  | 1.00  |

PIE 0.0004293 ± 0.0001333 0.001 0.0003019 ± 0.0002146 0.16 0.0005363 ± 0.0001798 0.003 0.0004563 ± 0.000159 0.004 0.0003928 ± 0.0002479 0.11

Abbreviations: CDE: Controlled Direct Effect; CES-D: Centers for Epidemiological Studies-Depression; DNAm: DNA methylation; DNAmAge: DNA methylation age; INTMED: Mediated Interaction; INTREF: Interaction referent; PIE: Pure Indirect Effect; TE: Total Effect. <sup>a</sup>OLS regression models with epigenetic clocks as alternative outcomes and point PD measured in 2010–2012 as exposures and CES-D scores measured in 2014–2016 as a potential mediator, sample size *N* = 2,806, four-way mediation analysis. Stratified analysis by sex and/or race was also presented. Italicized findings have *p* < 0.10 but >0.05. <sup>b</sup>Exogenous variables are the ones included in Table 2, Model 1, as covariates. See Covariates section for detail.

### Supplementary Table 4. Reasons for Perceived discrimination (RPD: 2010/2012) → depressive symptoms (CES-D: 2014/2016) → epigenetic clocks (2016): 4-way mediation analysis, overall and by sex and race, reduced model: HRS 2010–2016.

| Y =<br>Epigenetic<br>clock | Overall                      |              | Males                        |              | Females                      |              | NHW                         |              | Non-Whites                  |              |
|----------------------------|------------------------------|--------------|------------------------------|--------------|------------------------------|--------------|-----------------------------|--------------|-----------------------------|--------------|
|                            | $\beta \pm SE$               | <i>P</i>     | $\beta \pm SE$               | <i>P</i>     | $\beta \pm SE$               | <i>P</i>     | $\beta \pm SE$              | <i>P</i>     | $\beta \pm SE$              | <i>P</i>     |
| HORVATH DNAmAge            |                              |              |                              |              |                              |              |                             |              |                             |              |
| TE                         | -0.0535582 ± 0.0903702       | 0.55         | -0.1443057 ± 0.1376973       | 0.30         | 0.0134141 ± 0.119973         | 0.91         | 0.0086883 ± 0.1231711       | 0.94         | -0.1247175 ± 0.1297758      | 0.34         |
| CDE                        | -0.0854419 ± 0.1074138       | 0.43         | -0.1514943 ± 0.1622281       | 0.35         | -0.0300265 ± 0.1444936       | 0.84         | -0.000204 ± 0.1432616       | 1.00         | -0.2100947 ± 0.1641615      | 0.20         |
| INTREF                     | 0.0381976 ± 0.0369128        | 0.30         | 0.0427118 ± 0.0587631        | 0.47         | 0.0309235 ± 0.049463         | 0.53         | 0.0171541 ± 0.0421285       | 0.68         | 0.09293 ± 0.0794797         | 0.24         |
| INTMED                     | 0.009544 ± 0.0092575         | 0.30         | 0.0104492 ± 0.0144552        | 0.47         | 0.0078196 ± 0.0125332        | 0.53         | 0.0066735 ± 0.0163971       | 0.68         | 0.010264 ± 0.0091021        | 0.26         |
| PIE                        | -0.015858 ± 0.0226344        | 0.48         | -0.0459724 ± 0.0347272       | 0.19         | 0.0046975 ± 0.030629         | 0.88         | -0.0149353 ± 0.0357075      | 0.68         | -0.0178168 ± 0.0262914      | 0.50         |
| HANNUM DNAmAge             |                              |              |                              |              |                              |              |                             |              |                             |              |
| TE                         | 0.0344417 ± 0.0727078        | 0.67         | 0.0324369 ± 0.1118175        | 0.77         | 0.0363654 ± 0.0959864        | 0.71         | <i>0.1745326 ± 0.099781</i> | <i>0.080</i> | -0.1477397 ± 0.1013168      | 0.15         |
| CDE                        | 0.021214 ± 0.0862353         | 0.81         | 0.0304539 ± 0.1317737        | 0.82         | 0.0167592 ± 0.1152535        | 0.88         | 0.1698007 ± 0.1158047       | 0.14         | -0.1832859 ± 0.1280906      | 0.15         |
| INTREF                     | -0.0305501 ± 0.029635        | 0.30         | -0.0263818 ± 0.0477045       | 0.58         | -0.0344673 ± 0.0394759       | 0.38         | -0.0464508 ± 0.0341564      | 0.17         | 0.0067812 ± 0.0618586       | 0.91         |
| INTMED                     | -0.0076332 ± 0.0074321       | 0.30         | -0.0064541 ± 0.0117079       | 0.58         | -0.0087157 ± 0.0100219       | 0.38         | -0.0180713 ± 0.0133558      | 0.18         | 0.0007492 ± 0.0068352       | 0.91         |
| PIE                        | 0.0514111 ± 0.018768         | 0.006        | 0.034819 ± 0.0281238         | 0.22         | 0.0627892 ± 0.0254858        | 0.014        | 0.069254 ± 0.0295713        | 0.019        | 0.0280158 ± 0.0213552       | 0.19         |
| LEVINE DNAmAge             |                              |              |                              |              |                              |              |                             |              |                             |              |
| TE                         | 0.0988918 ± 0.0962204        | 0.30         | 0.0254435 ± 0.144451         | 0.86         | 0.1620573 ± 0.1289253        | 0.21         | 0.3448994 ± 0.1310714       | 0.009        | -0.1949576 ± 0.1375862      | 0.16         |
| CDE                        | 0.0762701 ± 0.1138207        | 0.50         | 0.0371221 ± 0.1697287        | 0.83         | 0.1329307 ± 0.1543623        | 0.39         | 0.3298103 ± 0.1514449       | 0.029        | -0.2608407 ± 0.1740669      | 0.13         |
| INTREF                     | -0.0604681 ± 0.0391635       | 0.12         | -0.0719209 ± 0.0616121       | 0.24         | -0.06932 ± 0.0529462         | 0.19         | -0.1010561 ± 0.044912       | 0.024        | 0.0302025 ± 0.0840824       | 0.72         |
| INTMED                     | -0.0151085 ± 0.0098667       | 0.13         | -0.017595 ± 0.0152863        | 0.25         | -0.0175289 ± 0.0135079       | 0.19         | -0.039315 ± 0.0177146       | 0.026        | 0.0033365 ± 0.0093209       | 0.72         |
| PIE                        | 0.0981983 ± 0.0256588        | 0.000        | 0.0778372 ± 0.0376508        | 0.039        | 0.1159755 ± 0.0353643        | 0.001        | 0.1554602 ± 0.0404599       | <0.001       | 0.0323441 ± 0.0286036       | 0.258        |
| HORVATH 2 DNAmAge          |                              |              |                              |              |                              |              |                             |              |                             |              |
| TE                         | <i>0.1026264 ± 0.0616615</i> | <i>0.096</i> | <i>0.1783227 ± 0.0963915</i> | <i>0.064</i> | 0.0447054 ± 0.0804603        | 0.59         | 0.2815875 ± 0.0842897       | 0.001        | -0.1212641 ± 0.0871261      | 0.16         |
| CDE                        | 0.0961187 ± 0.0732552        | 0.19         | 0.1803375 ± 0.1136303        | 0.11         | 0.0279376 ± 0.0968616        | 0.77         | 0.2899032 ± 0.0979432       | 0.003        | -0.1694663 ± 0.1103595      | 0.13         |
| INTREF                     | -0.0143136 ± 0.0251569       | 0.57         | -0.0225991 ± 0.0411359       | 0.58         | -0.0044129 ± 0.0331399       | 0.89         | -0.034293 ± 0.0288664       | 0.24         | 0.0413532 ± 0.0533637       | 0.44         |
| INTMED                     | -0.0035764 ± 0.0062928       | 0.57         | -0.0055287 ± 0.0100953       | 0.58         | -0.0011159 ± 0.0083809       | 0.89         | -0.0133413 ± 0.0112737      | 0.24         | 0.0045682 ± 0.0059915       | 0.45         |
| PIE                        | 0.0243976 ± 0.0155735        | 0.12         | 0.0261129 ± 0.0241334        | 0.28         | 0.0222967 ± 0.0206908        | 0.28         | 0.0393186 ± 0.0246738       | 0.11         | 0.0022808 ± 0.0174407       | 0.90         |
| LIN DNAmAge                |                              |              |                              |              |                              |              |                             |              |                             |              |
| TE                         | 0.0161015 ± 0.1058051        | 0.88         | -0.0319931 ± 0.1582704       | 0.84         | 0.0588192 ± 0.1418196        | 0.68         | 0.2113883 ± 0.1459292       | 0.15         | -0.1942426 ± 0.14584        | 0.18         |
| CDE                        | -0.0155356 ± 0.12573         | 0.90         | 0.023613 ± 0.1867545         | 0.90         | -0.0127457 ± 0.170582        | 0.94         | 0.2303516 ± 0.169564        | 0.17         | <i>-0.325804 ± 0.184643</i> | <i>0.078</i> |
| INTREF                     | -0.0031558 ± 0.0431648       | 0.94         | -0.043412 ± 0.0676271        | 0.52         | 0.005537 ± 0.058362          | 0.92         | -0.0625261 ± 0.0499875      | 0.21         | 0.1132211 ± 0.0894854       | 0.21         |
| INTMED                     | -0.0007885 ± 0.0107853       | 0.94         | -0.0106205 ± 0.0166157       | 0.52         | 0.0014001 ± 0.0147587        | 0.92         | -0.0243253 ± 0.019531       | 0.21         | 0.012506 ± 0.01031          | 0.23         |
| PIE                        | 0.0355814 ± 0.0266483        | 0.18         | -0.0015737 ± 0.0390555       | 0.97         | <i>0.0646278 ± 0.0369201</i> | <i>0.080</i> | 0.0678881 ± 0.0427146       | 0.11         | 0.0058338 ± 0.0292008       | 0.84         |
| WEIDNER DNAmAge            |                              |              |                              |              |                              |              |                             |              |                             |              |
| TE                         | -0.0557187 ± 0.1498036       | 0.71         | 0.107925 ± 0.2263041         | 0.63         | -0.1679082 ± 0.199936        | 0.40         | -0.0622503 ± 0.2060429      | 0.76         | 0.0070123 ± 0.209054        | 0.97         |
| CDE                        | -0.1272193 ± 0.1780053       | 0.48         | 0.1515346 ± 0.2664227        | 0.57         | -0.2998148 ± 0.2407388       | 0.21         | -0.0788371 ± 0.2394521      | 0.74         | -0.1554603 ± 0.2646827      | 0.56         |
| INTREF                     | 0.014877 ± 0.0611136         | 0.81         | -0.1053808 ± 0.096669        | 0.28         | 0.0758886 ± 0.0824655        | 0.36         | -0.0539771 ± 0.0704672      | 0.44         | 0.1195995 ± 0.1280105       | 0.35         |
| INTMED                     | 0.0037172 ± 0.015273         | 0.81         | -0.0257807 ± 0.0239415       | 0.28         | 0.01919 ± 0.0209451          | 0.36         | -0.0209991 ± 0.0274587      | 0.44         | 0.0132126 ± 0.0144783       | 0.36         |
| PIE                        | 0.0529064 ± 0.0377582        | 0.16         | 0.0875519 ± 0.0574783        | 0.13         | 0.0368279 ± 0.0512003        | 0.472        | 0.0915628 ± 0.0602564       | 0.13         | 0.0296604 ± 0.0424281       | 0.49         |
| VIDAL-BRALO DNAmAge        |                              |              |                              |              |                              |              |                             |              |                             |              |

|                   |                             |              |                              |              |                             |              |                              |              |                              |              |
|-------------------|-----------------------------|--------------|------------------------------|--------------|-----------------------------|--------------|------------------------------|--------------|------------------------------|--------------|
| TE                | 0.1084912 ± 0.0702483       | 0.12         | 0.0178189 ± 0.1069319        | 0.89         | 0.1853357 ± 0.0933298       | 0.047        | <i>0.18725 ± 0.0968462</i>   | <i>0.053</i> | 0.0378987 ± 0.0973401        | 0.70         |
| CDE               | 0.0825509 ± 0.0834268       | 0.32         | 0.0592193 ± 0.1257899        | 0.64         | 0.135604 ± 0.1122966        | 0.23         | <i>0.1932932 ± 0.1124779</i> | <i>0.086</i> | -0.0431816 ± 0.1231865       | 0.73         |
| INTREF            | -0.0071078 ± 0.028643       | 0.80         | -0.0696407 ± 0.0457747       | 0.13         | 0.010139 ± 0.038424         | 0.79         | -0.0439231 ± 0.0331697       | 0.19         | 0.0554439 ± 0.0596059        | 0.35         |
| INTMED            | -0.0017759 ± 0.0071583      | 0.80         | -0.0170371 ± 0.0114663       | 0.14         | 0.0025639 ± 0.0097198       | 0.79         | -0.0170879 ± 0.0129667       | 0.19         | 0.0061243 ± 0.006739         | 0.36         |
| PIE               | <i>0.034824 ± 0.0178459</i> | <i>0.051</i> | <i>0.0452775 ± 0.0273013</i> | <i>0.097</i> | 0.0370288 ± 0.0241836       | 0.13         | <i>0.0549677 ± 0.0284892</i> | <i>0.054</i> | 0.0195121 ± 0.0200322        | 0.33         |
| YANG DNAmAge      |                             |              |                              |              |                             |              |                              |              |                              |              |
| TE                | -0.0002345 ± 0.000254       | 0.36         | -0.000297 ± 0.0004213        | 0.48         | -0.000184 ± 0.0003155       | 0.56         | -0.0005553 ± 0.0003447       | 0.11         | 0.0002999 ± 0.0003676        | 0.42         |
| CDE               | -0.0004507 ± 0.0003019      | 0.14         | -0.0004215 ± 0.0004968       | 0.40         | -0.0004414 ± 0.0003799      | 0.25         | -0.000656 ± 0.0004007        | 0.10         | -0.0001649 ± 0.0004649       | 0.72         |
| INTREF            | 0.0001327 ± 0.0001038       | 0.20         | 0.0000177 ± 0.0001797        | 0.92         | 0.0001863 ± 0.0001304       | 0.15         | -0.0000283 ± 0.0001178       | 0.81         | <i>0.0004184 ± 0.0002262</i> | <i>0.064</i> |
| INTMED            | 0.0000332 ± 0.0000261       | 0.20         | 0.0000043 ± 0.000044         | 0.92         | 0.0000471 ± 0.0000333       | 0.16         | -0.000011 ± 0.0000458        | 0.81         | <i>0.0000462 ± 0.0000272</i> | <i>0.09</i>  |
| PIE               | 0.0000503 ± 0.0000636       | 0.43         | 0.0001025 ± 0.0001052        | 0.33         | 0.0000241 ± 0.0000806       | 0.76         | 0.00014 ± 0.0001007          | 0.16         | 0.0000002 ± 0.0000734        | 1.00         |
| ZHANG DNAmAge     |                             |              |                              |              |                             |              |                              |              |                              |              |
| TE                | 0.0091244 ± 0.0059053       | 0.12         | <i>0.0151187 ± 0.0090044</i> | <i>0.093</i> | 0.0048389 ± 0.007841        | 0.54         | <i>0.0152963 ± 0.0080487</i> | <i>0.057</i> | 0.0016223 ± 0.00847          | 0.85         |
| CDE               | 0.0051013 ± 0.0069908       | 0.47         | 0.0155272 ± 0.0105257        | 0.14         | -0.001852 ± 0.0094171       | 0.84         | 0.0102421 ± 0.0093155        | 0.27         | -0.0025159 ± 0.0107079       | 0.81         |
| INTREF            | -0.0013697 ± 0.0024007      | 0.57         | -0.006127 ± 0.0038327        | 0.11         | 0.0012154 ± 0.0032226       | 0.71         | -0.0025158 ± 0.0027429       | 0.36         | 0.0015634 ± 0.0051722        | 0.76         |
| INTMED            | -0.0003422 ± 0.0006005      | 0.57         | -0.0014989 ± 0.0009624       | 0.12         | 0.0003073 ± 0.0008155       | 0.71         | -0.0009787 ± 0.0010696       | 0.36         | 0.0001727 ± 0.0005728        | 0.76         |
| PIE               | 0.0057351 ± 0.0015661       | <0.001       | 0.0072175 ± 0.0024903        | 0.004        | 0.0051682 ± 0.0020837       | 0.013        | 0.0085487 ± 0.0024559        | <0.001       | 0.0024021 ± 0.0017901        | 0.18         |
| BOCKLANDT DNAmAge |                             |              |                              |              |                             |              |                              |              |                              |              |
| TE                | 0.0008678 ± 0.0009813       | 0.38         | 0.0023248 ± 0.0015099        | 0.12         | -0.0003879 ± 0.0012946      | 0.764        | -0.0013589 ± 0.0012857       | 0.291        | 0.0035284 ± 0.0015488        | 0.023        |
| CDE               | 0.0008572 ± 0.0011666       | 0.46         | 0.0015727 ± 0.0017754        | 0.38         | -0.0002488 ± 0.0015592      | 0.873        | -0.0015788 ± 0.0014949       | 0.291        | 0.0041047 ± 0.0019613        | 0.036        |
| INTREF            | 0.0001334 ± 0.0004005       | 0.74         | <i>0.0011334 ± 0.0006473</i> | <i>0.080</i> | -0.0001227 ± 0.0005335      | 0.818        | 0.0004192 ± 0.0004402        | 0.341        | -0.0006225 ± 0.000948        | 0.511        |
| INTMED            | 0.0000333 ± 0.0001001       | 0.74         | <i>0.0002773 ± 0.0001634</i> | <i>0.090</i> | -0.000031 ± 0.0001349       | 0.818        | 0.0001631 ± 0.0001717        | 0.342        | -0.0000688 ± 0.000106        | 0.516        |
| PIE               | -0.0001562 ± 0.0002457      | 0.53         | <i>-0.000659 ± 0.000386</i>  | <i>0.088</i> | 0.0000146 ± 0.0003305       | 0.965        | -0.0003624 ± 0.0003739       | 0.332        | 0.0001149 ± 0.0003111        | 0.712        |
| GARAGNANI DNAmAge |                             |              |                              |              |                             |              |                              |              |                              |              |
| TE                | 0.0004467 ± 0.0007591       | 0.56         | 0.0011673 ± 0.0011508        | 0.31         | -0.0000577 ± 0.0010108      | 0.95         | 0.0016044 ± 0.0010513        | 0.13         | -0.0007429 ± 0.0010294       | 0.47         |
| CDE               | 0.0000815 ± 0.0009021       | 0.93         | 0.0012448 ± 0.0013568        | 0.36         | -0.0006705 ± 0.001217       | 0.58         | 0.0017309 ± 0.0012225        | 0.16         | -0.0018332 ± 0.0013022       | 0.16         |
| INTREF            | 0.0001044 ± 0.0003097       | 0.74         | -0.0003011 ± 0.0004913       | 0.54         | 0.000324 ± 0.0004167        | 0.44         | -0.0003064 ± 0.0003599       | 0.40         | 0.0007811 ± 0.0006309        | 0.22         |
| INTMED            | 0.0000261 ± 0.0000774       | 0.74         | -0.0000737 ± 0.0001207       | 0.54         | 0.0000819 ± 0.0001057       | 0.44         | -0.0001192 ± 0.0001403       | 0.40         | 0.0000863 ± 0.0000726        | 0.24         |
| PIE               | 0.0002346 ± 0.000191        | 0.22         | 0.0002973 ± 0.0002878        | 0.30         | 0.0002069 ± 0.000259        | 0.43         | 0.0002991 ± 0.0003058        | 0.33         | 0.0002229 ± 0.0002127        | 0.30         |
| DNAm GRIMAGE      |                             |              |                              |              |                             |              |                              |              |                              |              |
| TE                | 0.1761732 ± 0.0612903       | 0.004        | 0.020766 ± 0.0956298         | 0.83         | 0.2956451 ± 0.0799387       | <0.001       | 0.1952763 ± 0.0820687        | 0.017        | 0.1509621 ± 0.0919291        | 0.10         |
| CDE               | 0.1136006 ± 0.0724519       | 0.12         | -0.0636511 ± 0.1122953       | 0.57         | 0.2564346 ± 0.095593        | 0.007        | 0.1048024 ± 0.0948908        | 0.27         | 0.1208863 ± 0.1159003        | 0.30         |
| INTREF            | -0.0053663 ± 0.0248744      | 0.83         | 0.0205033 ± 0.0406476        | 0.61         | -0.0328315 ± 0.0327533      | 0.32         | -0.0038113 ± 0.0279016       | 0.89         | -0.0061629 ± 0.0559677       | 0.91         |
| INTMED            | -0.0013408 ± 0.0062161      | 0.83         | 0.005016 ± 0.0099706         | 0.62         | -0.0083021 ± 0.0083257      | 0.32         | -0.0014828 ± 0.0108555       | 0.89         | -0.0006811 ± 0.0061844       | 0.91         |
| PIE               | 0.0692797 ± 0.0165738       | <0.001       | 0.0588978 ± 0.0253337        | 0.020        | 0.0803441 ± 0.0222938       | <0.001       | 0.095768 ± 0.0252964         | <0.001       | <i>0.0369198 ± 0.0204061</i> | <i>0.070</i> |
| MPOA              |                             |              |                              |              |                             |              |                              |              |                              |              |
| TE                | 0.0032687 ± 0.0012509       | 0.009        | 0.0019199 ± 0.001945         | 0.32         | 0.0042659 ± 0.0016386       | 0.009        | 0.0036355 ± 0.0016903        | 0.031        | 0.0027659 ± 0.0018405        | 0.13         |
| CDE               | 0.0031488 ± 0.001482        | 0.034        | 0.0011998 ± 0.0022912        | 0.60         | 0.0045412 ± 0.0019641       | 0.021        | <i>0.0032516 ± 0.0019614</i> | <i>0.097</i> | 0.0033033 ± 0.0023126        | 0.15         |
| INTREF            | -0.000746 ± 0.0005098       | 0.14         | -0.0000056 ± 0.0008288       | 1.00         | <i>-0.001229 ± 0.000675</i> | <i>0.069</i> | -0.0006144 ± 0.0005778       | 0.29         | -0.0012455 ± 0.0011197       | 0.27         |
| INTMED            | -0.0001864 ± 0.0001283      | 0.15         | -0.0000014 ± 0.0002028       | 1.00         | <i>-0.000311 ± 0.000174</i> | <i>0.073</i> | -0.000239 ± 0.0002255        | 0.29         | -0.0001376 ± 0.0001278       | 0.28         |
| PIE               | 0.0010524 ± 0.000327        | 0.001        | 0.000727 ± 0.0004933         | 0.14         | 0.001265 ± 0.0004413        | 0.004        | 0.0012373 ± 0.0005022        | 0.014        | 0.0008456 ± 0.0004196        | 0.044        |

Abbreviations: CDE: Controlled Direct Effect; CES-D: Centers for Epidemiological Studies-Depression; DNAm: DNA methylation; DNAmAge: DNA methylation age; INTMED: Mediated Interaction; INTREF: Interaction referent; PIE: Pure Indirect Effect; TE: Total Effect. <sup>a</sup>OLS regression models with epigenetic clocks as alternative outcomes and point RPD measured in 2010–2012 as exposures and CES-D scores measured in 2014–2016 as a potential mediator, sample size  $N = 2,806$ , four-way mediation analysis. Stratified analysis by sex and/or race was also presented. Italicized findings have  $p < 0.10$  but  $>0.05$ . <sup>b</sup>Exogenous variables are the ones included in Table 2, Model 1, as covariates. See Covariates section for detail.

**Supplementary Table 5. Perceived discrimination (EOD/RPD: 2010/2012) → depressive symptoms (CES-D: 2014/2016) → epigenetic clocks (2016): Structural Equations Modeling, overall, reduced model: HRS 2010-2016<sup>a,b</sup>.**

|                            | EOD                                       |                                            |                                                    |                                               |                                              | RPD                                         |                                               |                                                    |                                        |                                          |
|----------------------------|-------------------------------------------|--------------------------------------------|----------------------------------------------------|-----------------------------------------------|----------------------------------------------|---------------------------------------------|-----------------------------------------------|----------------------------------------------------|----------------------------------------|------------------------------------------|
|                            | Total effect                              | EOD→CESD→EPI<br>CLOCK<br>Indirect effect   | EOD<br>→EPICLOCK<br>Direct effect<br>$\alpha_{13}$ | EOD<br>→CESD<br>$\alpha_{12}$                 | CESD<br>→EPICLOCK<br>$\alpha_{23}$           | Total<br>effect                             | RPD→CESD→<br>EPICLOCK<br>Indirect effect      | RPD<br>→EPICLOCK<br>Direct effect<br>$\alpha_{13}$ | RPD<br>→CESD<br>$\alpha_{12}$          | CESD<br>→EPICLOCK<br>$\alpha_{23}$       |
| HORVAT<br>H<br>DNAmAge     | -0.0062 ± 0.029<br><br><i>P</i> = 0.833   | -0.0002 ± 0.0071<br><br><i>P</i> = 0.98    | -0.0060 ± 0.030<br><br><i>P</i> = 0.84             | +0.106 ± 0.008<br><br><i>P</i> < 0.001        | -0.002 ± 0.067<br><br><i>P</i> = 0.98        | -0.0244<br>± 0.084<br><br><i>P</i> = 0.77   | -0.0003 ±<br>0.0167<br><br><i>P</i> = 0.99    | -0.024 ± 0.085<br><br><i>P</i> = 0.78              | +0.251 ± 0.024<br><br><i>P</i> < 0.001 | -0.001 ± 0.067<br><br><i>P</i> = 0.78    |
| HANNUM<br>DNAmAge          | +0.0013 ± 0.0236<br><br><i>P</i> = 0.96   | +0.016 ± 0.006<br><br><i>P</i> = 0.005     | -0.015 ± 0.024<br><br><i>P</i> = 0.53              | +0.106 ± 0.008<br><br><i>P</i> < 0.001        | +0.156 ± 0.054<br><br><i>P</i> = 0.004       | +0.0009<br>± 0.0671<br><br><i>P</i> = 0.99  | +0.0387 ±<br>0.0139<br><br><i>P</i> = 0.005   | -0.0379 ± 0.0683<br><br><i>P</i> = 0.58            | +0.251 ± 0.023<br><br><i>P</i> < 0.001 | +0.154 ± 0.055<br><br><i>P</i> < 0.001   |
| LEVINE<br>DNAmAge          | -0.0030 ± 0.0313<br><br><i>P</i> = 0.92   | +0.032 ± 0.008<br><br><i>P</i> < 0.001     | -0.035 ± 0.032<br><br><i>P</i> = 0.27              | +0.106 ± 0.008<br><br><i>P</i> < 0.001        | +0.1564 ± 0.054<br><br><i>P</i> = 0.004      | +0.041 ±<br>0.088<br><br><i>P</i> = 0.64    | +0.073 ± 0.019<br><br><i>P</i> < 0.001        | -0.032 ± 0.090<br><br><i>P</i> = 0.72              | +0.251 ± 0.024<br><br><i>P</i> < 0.001 | +0.292 ± 0.071<br><br><i>P</i> < 0.001   |
| HORVAT<br>H 2<br>DNAmAge   | +0.025 ± 0.020<br><br><i>P</i> = 0.20     | +0.008 ± 0.0055<br><br><i>P</i> = 0.12     | +0.018 ± 0.021<br><br><i>P</i> = 0.39              | +0.105 ± 0.008<br><br><i>P</i> < 0.001        | +0.073 ± 0.046<br><br><i>P</i> = 0.11        | +0.080 ±<br>0.057<br><br><i>P</i> = 0.16    | +0.018 ± 0.012<br><br><i>P</i> = 0.12         | +0.062 ± 0.058<br><br><i>P</i> = 0.29              | +0.251 ± 0.024<br><br><i>P</i> < 0.001 | +0.073 ± 0.046<br><br><i>P</i> = 0.11    |
| LIN<br>DNAmAge             | +0.015 ± 0.034<br><br><i>P</i> = 0.65     | +0.014 ± 0.008<br><br><i>P</i> = 0.097     | +0.002 ± 0.035<br><br><i>P</i> = 0.96              | +0.106 ± 0.008<br><br><i>P</i> < 0.001        | +0.132 ± 0.079<br><br><i>P</i> = 0.094       | +0.011 ±<br>0.098<br><br><i>P</i> = 0.91    | +0.034 ± 0.020<br><br><i>P</i> = 0.085        | -0.024 ± 0.100<br><br><i>P</i> = 0.81              | +0.251 ± 0.024<br><br><i>P</i> < 0.001 | +0.137 ± 0.078<br><br><i>P</i> = 0.080   |
| WEIDNER<br>DNAmAge         | -0.030 ± 0.049<br><br><i>P</i> = 0.55     | +0.027 ± 0.012<br><br><i>P</i> = 0.026     | -0.056 ± 0.050<br><br><i>P</i> = 0.26              | +0.106 ± 0.008<br><br><i>P</i> < 0.001        | +0.253 ± 0.050<br><br><i>P</i> = 0.023       | -0.025 ±<br>0.140<br><br><i>P</i> = 0.86    | +0.059 ± 0.028<br><br><i>P</i> = 0.036        | -0.085 ± 0.141<br><br><i>P</i> = 0.55              | +0.251 ± 0.023<br><br><i>P</i> < 0.001 | +0.237 ± 0.111<br><br><i>P</i> = 0.032   |
| VIDAL-B<br>RALO<br>DNAmAge | -0.003 ± 0.023<br><br><i>P</i> = 0.91     | +0.016 ± 0.006<br><br><i>P</i> = 0.006     | -0.018 ± 0.024<br><br><i>P</i> = 0.44              | +0.106 ± 0.008<br><br><i>P</i> < 0.001        | +0.147 ± 0.052<br><br><i>P</i> = 0.005       | +0.101 ±<br>0.064<br><br><i>P</i> = 0.12    | +0.032 ± 0.013<br><br><i>P</i> = 0.017        | +0.069 ± 0.066<br><br><i>P</i> = 0.30              | +0.251 ± 0.023<br><br><i>P</i> < 0.001 | +0.127 ± 0.052<br><br><i>P</i> = 0.014   |
| YANG<br>DNAmAge            | +0.0000 ± 0.0001<br><br><i>P</i> = 1.00   | +0.0023 ± 0.0005<br><br><i>P</i> < 0.001   | -0.0000 ± 0.0001<br><br><i>P</i> = 0.61            | +0.106 ± 0.008<br><br><i>P</i> < 0.001        | +0.0004 ± 0.0002<br><br><i>P</i> = 0.030     | -0.0001<br>± 0.0002<br><br><i>P</i> = 0.67  | +0.00011 ±<br>0.00005<br><br><i>P</i> = 0.028 | -0.0002 ± 0.0002<br><br><i>P</i> = 0.39            | +0.251 ± 0.024<br><br><i>P</i> < 0.001 | +0.0004 ± 0.0002<br><br><i>P</i> = 0.025 |
| ZHANG<br>DNAmAge           | +0.0008 ± 0.0019<br><br><i>P</i> = 0.68   | +0.0023 ± 0.0005<br><br><i>P</i> < 0.001   | -0.002 ± 0.002<br><br><i>P</i> = 0.44              | +0.106 ± 0.008<br><br><i>P</i> < 0.001        | +0.022 ± 0.004<br><br><i>P</i> < 0.001       | +0.008 ±<br>0.005<br><br><i>P</i> = 0.14    | +0.0052 ±<br>0.0012<br><br><i>P</i> < 0.001   | -0.0029 ± 0.0055<br><br><i>P</i> = 0.60            | +0.251 ± 0.024<br><br><i>P</i> < 0.001 | +0.021 ± 0.004<br><br><i>P</i> < 0.001   |
| BOCKLAN<br>DT<br>DNAmAge   | +0.0007 ± 0.0003<br><br><i>P</i> = 0.027  | +0.0008 ± 0.0004<br><br><i>P</i> = 0.019   | -0.0001 ± 0.0001<br><br><i>P</i> = 0.39            | +0.106 ± 0.008<br><br><i>P</i> < 0.001        | -0.0006 ± 0.0007<br><br><i>P</i> = 0.39      | +0.0010<br>± 0.0009<br><br><i>P</i> = 0.27  | -0.0001 ±<br>0.0002<br><br><i>P</i> = 0.58    | +0.0011 ± 0.0009<br><br><i>P</i> = 0.23            | +0.251 ± 0.024<br><br><i>P</i> < 0.001 | -0.0004 ± 0.0007<br><br><i>P</i> = 0.58  |
| GARAGN<br>ANI<br>DNAmAge   | +0.00035 ± 0.00025<br><br><i>P</i> = 0.15 | +0.0002 ± 0.0003<br><br><i>P</i> = 0.33    | +0.0002 ± 0.0003<br><br><i>P</i> = 0.33            | +0.00011 ±<br>0.00006<br><br><i>P</i> = 0.079 | +0.0010 ±<br>0.00057<br><br><i>P</i> = 0.076 | +0.0005<br>± 0.0007<br><br><i>P</i> = 0.49  | +0.0003 ±<br>0.0001<br><br><i>P</i> = 0.05    | +0.0002 ± 0.0007<br><br><i>P</i> = 0.77            | +0.251 ± 0.024<br><br><i>P</i> < 0.001 | +0.0011 ± 0.0006<br><br><i>P</i> = 0.05  |
| DNAm<br>GRIMAGE            | +0.0254 ± 0.020<br><br><i>P</i> = 0.20    | +0.030 ± 0.005<br><br><i>P</i> < 0.001     | -0.0048 ± 0.0204<br><br><i>P</i> = 0.82            | +0.1057 ± 0.0083<br><br><i>P</i> < 0.001      | +0.286 ± 0.045<br><br><i>P</i> < 0.001       | +0.170 ±<br>0.57<br><br><i>P</i> = 0.003    | +0.067 ± 0.013<br><br><i>P</i> < 0.001        | +0.1028 ± 0.0574<br><br><i>P</i> = 0.073           | +0.251 ± 0.024<br><br><i>P</i> < 0.001 | +0.268 ± 0.045<br><br><i>P</i> < 0.001   |
| MPOA                       | +0.00033 ± 0.00041<br><br><i>P</i> = 0.41 | +0.00035 ± 0.00010<br><br><i>P</i> = 0.001 | -0.0000 ± 0.0004<br><br><i>P</i> = 0.98            | +0.1057 ± 0.0083<br><br><i>P</i> < 0.001      | +0.0033 ± 0.0009<br><br><i>P</i> < 0.001     | +0.0026<br>± 0.0011<br><br><i>P</i> = 0.024 | +0.00074 ±<br>0.00024<br><br><i>P</i> = 0.002 | +0.0018 ± 0.0012<br><br><i>P</i> = 0.12            | +0.251 ± 0.024<br><br><i>P</i> < 0.001 | +0.0030 ± 0.0009<br><br><i>P</i> = 0.001 |

Abbreviations: CES-D: Centers for Epidemiological Studies-Depression; DNAm: DNA methylation; DNAmAge: DNA methylation age; EOD: Experience of Discrimination; HRS: Health and Retirement Study; RPD: Reasons for Perceived Discrimination; SEM: Structural Equations Modeling. <sup>a</sup>Structural Equations Models with Y = EPICLOCK at v<sub>3</sub>, X = Perceived discrimination scores (EOD/RPD) at v0v1 and mediator M (CES-D total score) at v2v3. Italicized findings have *p* < 0.10 but >0.05. <sup>b</sup>Exogenous variables were age in 2016, sex and race/ethnicity.
